# Supplementary material
Source: publisher site journal article supplement (http://kjim.org/upload/media/kjim-2019-308-suppl6.pdf)
Supplement: Supplementary file 1 [file kjim-2019-308-suppl6.pdf]

**Supplementary Table 6. Angina symptoms grade and calcium channel blocker by ordered logistic regression in patients with definite spasm**

| Variable        | Unadjusted |           |         | Adjusted  |           |         |
|-----------------|------------|-----------|---------|-----------|-----------|---------|
|                 | OR         | 95% CI    | p value | OR        | 95% CI    | p value |
| <b>1st year</b> |            |           |         |           |           |         |
| Diltiazem       | Reference  |           |         | Reference |           |         |
| Amlodipine      | 1.33       | 0.71–2.49 | 0.367   | 1.13      | 0.59–2.16 | 0.718   |
| Nifedipine      | 0.49       | 0.27–0.90 | 0.021   | 0.38      | 0.20–0.72 | 0.003   |
| Benidipine      | 0.64       | 0.25–1.62 | 0.349   | 0.53      | 0.20–1.38 | 0.194   |
| <b>2nd year</b> |            |           |         |           |           |         |
| Diltiazem       | Reference  |           |         | Reference |           |         |
| Amlodipine      | 1.46       | 0.65–3.29 | 0.364   | 1.17      | 0.50–2.75 | 0.711   |
| Nifedipine      | 0.34       | 0.18–0.65 | 0.001   | 0.29      | 0.15–0.56 | 0.000   |
| Benidipine      | 0.28       | 0.11–0.74 | 0.010   | 0.20      | 0.07–0.55 | 0.002   |
| <b>3rd year</b> |            |           |         |           |           |         |
| Diltiazem       | Reference  |           |         | Reference |           |         |
| Amlodipine      | 0.85       | 0.35–2.04 | 0.712   | 0.78      | 0.31–1.94 | 0.589   |
| Nifedipine      | 0.35       | 0.18–0.66 | 0.001   | 0.27      | 0.14–0.54 | 0.000   |
| Benidipine      | 0.15       | 0.06–0.39 | 0.000   | 0.13      | 0.05–0.36 | 0.000   |

Adjusted models included age, sex, smoking, hypertension, diabetes mellitus, spasm severity, degree of atherosclerosis by angiography, history of coronary heart disease.

OR, odds ratio; CI, confidence interval.
